# Supplementary material for: SOS-Inducing Drugs Trigger Nucleic Acid Release and Biofilm Formation in Gram-Negative Bacteria
Source: MDPI journal article supplement (doi:10.3390/biom14030321), 2024-03-08
Supplement: s1 [file s1]

Supplemental Figures S1 and S2.

### Supplemental Figure S1.

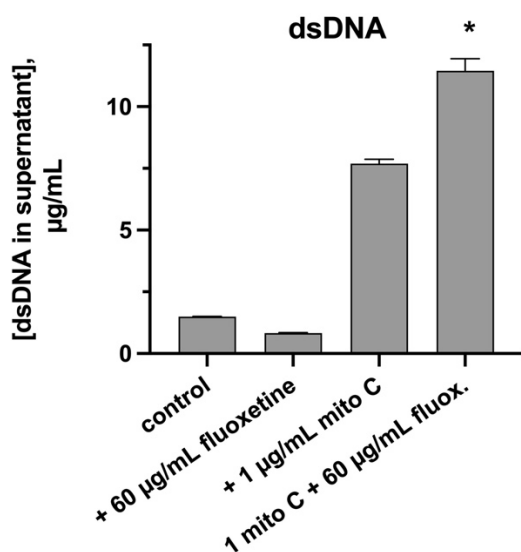

\*, significantly greater than mitomycin C alone,  $p < 0.01$

Legend to Supplemental Fig. 1. Strain E\_clo\_Niagara was grown and treated with fluoxetine, mitomycin C, or both, as described in Materials and Methods.

### Supplemental Fig. S2

#### dsDNA Release in *Acinetobacter* *baumannii*

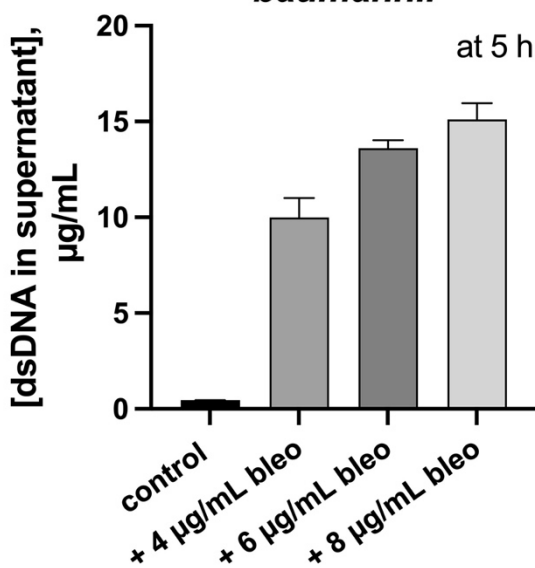

Strain SS\_6\_13
